# Supplementary material
Source: PubMed Central journal article supplement (PMC8886450)
Supplement: jamainternmed-e220045-s001.pdf [file jamainternmed-e220045-s001.pdf]

## Supplementary Online Content

Brito JP, Deng Y, Ross JS, et al. Association between generic-to-generic levothyroxine switching and thyrotropin levels among US adults. *JAMA Intern Med*. Published online February 28, 2022. doi:10.1001/jamainternmed.2022.0045

**eFigure.** Study Population Selection

**eTable 1.** Clinically Relevant Medications That May Affect Thyroid Function

**eTable 2.** TSH Levels Within 6 Weeks and 12 Months After Index Date Among Nonswitchers vs Switchers (Adjusted Regression Models)

**eTable 3.** Sensitivity Analysis Using TSH Levels Between 6 and 12 Weeks After Index Date Among Nonswitchers vs Switchers (Adjusted Regression Models)

**eTable 4.** Subgroup Analyses: Patients on Varying Doses of Levothyroxine (Adjusted Regression Models)

**eTable 5.** TSH Levels Within 6 Weeks and 12 Months After Index Date Among Nonswitchers vs Switchers (Using Robust Estimator of the Variance)

**eTable 6.** Sensitivity Analysis Using TSH Levels Between 6 and 12 Weeks After Index Date Among Nonswitchers vs Switchers (Using Robust Estimator of the Variance)

**eTable 7.** Subgroup Analyses: Patients on Varying Doses of Levothyroxine (Using Robust Estimator of the Variance)

This supplementary material has been provided by the authors to give readers additional information about their work.

**eFigure. Study Population Selection**

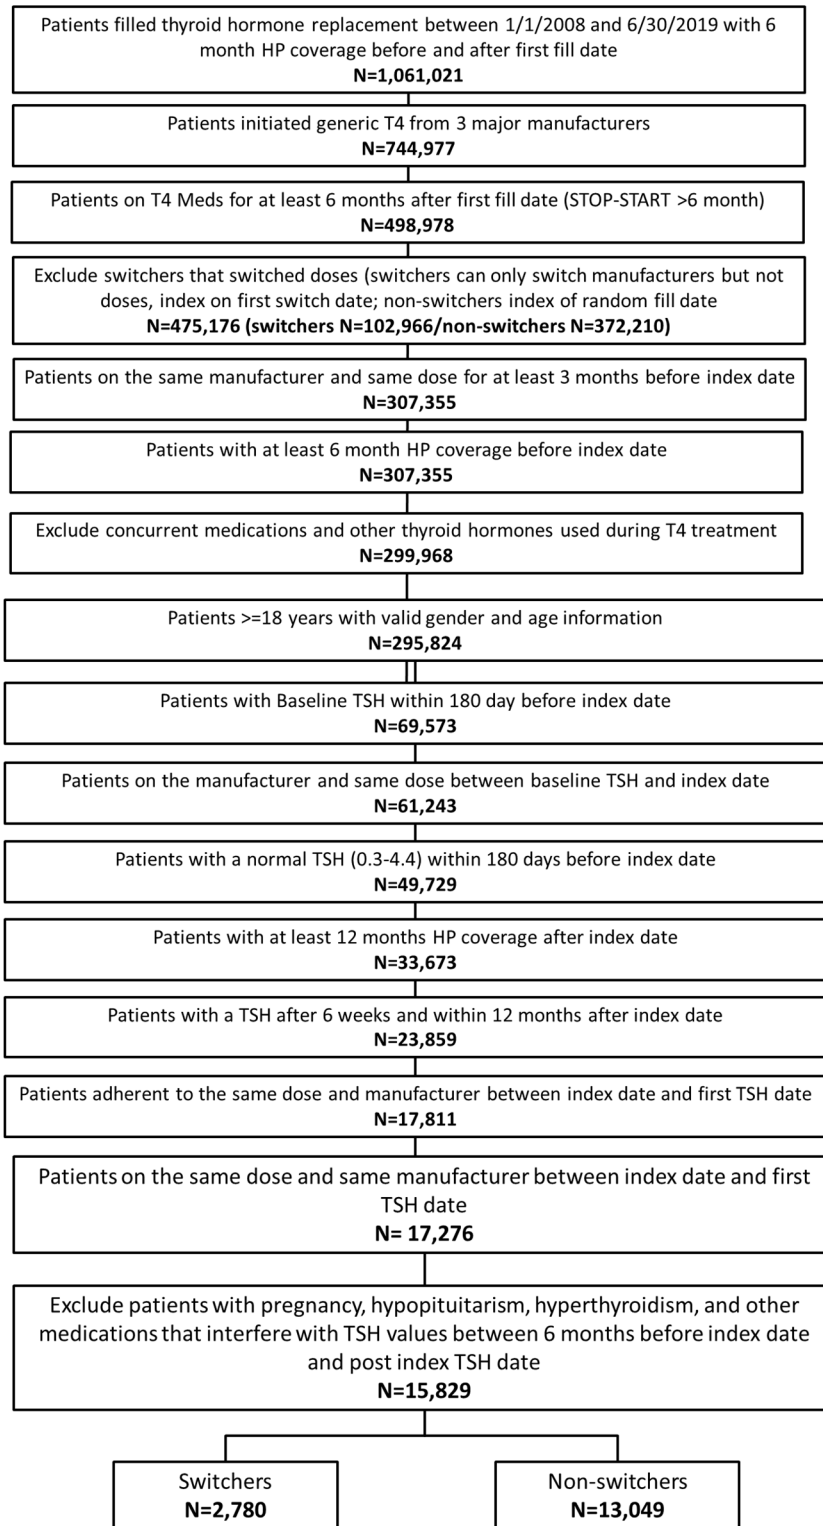

**eTable 1.** Clinically Relevant Medications That May Affect Thyroid Function

- Antithyroid Medications (PTU, Propylthiouracil, 6-N Propylthiouracil, Methimazole, Felimazole, Northyx, Tapazole, Thiamazole, Carbimazole, Benzylthiouracil, Methylthiouracil)
- Lithium carbonate
- Amiodarone hydrochloride
- Phenytoin
- Interferon alfa
- Interleukin 2
- Gefitinib
- Erlotinib
- Sorafenib
- Sunitinib
- Dasatinib
- Lenvatinib
- Imatinib
- Cabozantinib
- Vandetanib

**eTable 2.** TSH Levels Within 6 Weeks and 12 Months After Index Date Among Nonswitchers vs Switchers (Adjusted Regression Models)

|                                                   | Patients, %             |                    | Risk or mean difference (95% CI)       | P-value |
|---------------------------------------------------|-------------------------|--------------------|----------------------------------------|---------|
|                                                   | Nonswitchers (N=13,049) | Switchers (N=2780) |                                        |         |
| TSH level                                         |                         |                    |                                        |         |
| Normal (0.3-4.4 mU/L)                             | 84.4%                   | 85.7%              | Risk difference 0.013 (-0.001, 0.028)  | 0.08    |
| Abnormal (<0.3 or >4.4 mU/L)                      | 15.6%                   | 14.3%              | Risk difference -0.013 (-0.028, 0.001) | 0.08    |
| Markedly abnormal (<0.1 or >10 mU/L)              | 2.2%                    | 1.8%               | Risk difference -0.005 (-0.011, 0.001) | 0.12    |
| Adjusted mean TSH level (SD), mU/L                | 2.74                    | 2.71               | Mean difference -0.033 (-0.162, 0.096) | 0.61    |
| Adjusted mean TSH level change from baseline (SD) | 0.54                    | 0.51               | Mean difference -0.033 (-0.162, 0.096) | 0.61    |

**eTable 3.** Sensitivity Analysis Using TSH Levels Between 6 and 12 Weeks After Index Date Among Nonswitchers vs Switchers (Adjusted Regression Models)

|                                             | Patients, %            |                   | Risk or mean difference (95% CI)        | P-value |
|---------------------------------------------|------------------------|-------------------|-----------------------------------------|---------|
|                                             | Non-switchers (N=2769) | Switchers (N=677) |                                         |         |
| TSH level                                   |                        |                   |                                         |         |
| Normal (0.3-4.4 mU/L)                       | 84.8%                  | 85.0%             | Risk difference: 0.002 (-0.028, 0.032)  | 0.91    |
| Abnormal (<0.3 or >4.4 mU/L)                | 15.2%                  | 15.0%             | Risk difference: -0.002 (-0.032, 0.028) | 0.91    |
| Markedly abnormal (<0.1 or >10 mU/L)        | 2.4%                   | 2.1%              | Risk difference: -0.005 (-0.019, 0.009) | 0.52    |
| Adjusted mean TSH level (SD), mU/L          | 2.51                   | 2.86              | Mean difference: 0.251 (-0.133, 0.635)  | 0.20    |
| Adjusted mean TSH change from baseline (SD) | 0.39                   | 0.64              | Mean difference: 0.251 (-0.133, 0.635)  | 0.20    |

**eTable 4.** Subgroup Analyses: Patients on Varying Doses of Levothyroxine (Adjusted Regression Models)

| Levothyroxine dose >100 mcg                 | Patients, %             |                    | Risk or mean difference (95% CI)        | P-value |
|---------------------------------------------|-------------------------|--------------------|-----------------------------------------|---------|
|                                             | Non-switchers (N=1845)  | Switchers (N=367)  |                                         |         |
| TSH level                                   |                         |                    |                                         |         |
| Normal (0.3-4.4 mU/L)                       | 75.0%                   | 77.9%              | Risk difference: 0.028 (-0.019, 0.075)  | 0.26    |
| Abnormal (<0.3 or >4.4 mU/L)                | 25.0%                   | 22.1%              | Risk difference: -0.028 (-0.075, 0.019) | 0.26    |
| Markedly abnormal (<0.1 or >10 mU/L)        | 8.0%                    | 6.4%               | Risk difference: -0.016 (-0.044, 0.012) | 0.28    |
| Adjusted mean TSH level (SD), mU/L          | 2.49                    | 2.64               | Mean difference: 0.152 (-0.555, 0.858)  | 0.67    |
| Adjusted mean TSH change from baseline (SD) | 0.84                    | 0.99               | Mean difference: 0.152 (-0.555, 0.858)  | 0.67    |
| Levothyroxine dose <=100 mcg                | Non-switchers (N=11203) | Switchers (N=2413) | Risk or mean difference (95% CI)        | P-value |
| TSH level                                   |                         |                    |                                         |         |
| Normal (0.3-4.4 mU/L)                       | 85.8%                   | 87.0%              | Risk difference: 0.012 (-0.003, 0.027)  | 0.13    |
| Abnormal (<0.3 or >4.4 mU/L)                | 14.2%                   | 13.0%              | Risk difference: -0.012 (-0.027, 0.003) | 0.13    |
| Markedly abnormal (<0.1 or >10 mU/L)        | 1.8%                    | 1.5%               | Risk difference: -0.003 (-0.009, 0.002) | 0.28    |
| Adjusted mean TSH level (SD), mU/L          | 2.78                    | 2.73               | Mean difference: -0.047 (-0.152, 0.057) | 0.37    |
| Adjusted mean TSH change from baseline (SD) | 0.49                    | 0.44               | Mean difference: -0.048 (-0.152, 0.057) | 0.37    |

**eTable 5.** TSH Levels Within 6 Weeks and 12 Months After Index Date Among Nonswitchers vs Switchers (Using Robust Estimator of the Variance)

|                                      | Patients, n (%)        |                    | Risk or mean difference (95% CI)        | P-value |
|--------------------------------------|------------------------|--------------------|-----------------------------------------|---------|
|                                      | Non-switchers (N=2780) | Switchers (N=2780) |                                         |         |
| TSH level                            |                        |                    |                                         |         |
| Normal (0.3-4.4 mU/L)                | 2298 (82.7%)           | 2348 (84.5%)       | Risk difference: 0.018 (-0.001, 0.037)  | 0.07    |
| Abnormal (<0.3 or >4.4 mU/L)         | 482 (17.3%)            | 432 (15.5%)        | Risk difference: -0.018 (-0.037, 0.001) | 0.07    |
| Markedly abnormal (<0.1 or >10 mU/L) | 87 (3.1%)              | 69 (2.5%)          | Risk difference: -0.006 (-0.015, 0.002) | 0.15    |
| Mean TSH level (SD), mU/L            | 2.74 (2.34)            | 2.73 (3.29)        | Mean difference: -0.006 (-0.156, 0.144) | 0.94    |
| Mean TSH change from baseline (SD)   | 0.51 (2.28)            | 0.53 (3.25)        | Mean difference: 0.016 (-0.132, 0.163)  | 0.84    |

**eTable 6.** Sensitivity Analysis Using TSH Levels Between 6 and 12 Weeks After Index Date Among Nonswitchers vs Switchers (Using Robust Estimator of the Variance)

|                                      | Patients, n (%)       |                   | Risk or mean difference (95% CI)        | P-value |
|--------------------------------------|-----------------------|-------------------|-----------------------------------------|---------|
|                                      | Non-switchers (N=675) | Switchers (N=675) |                                         |         |
| TSH level                            |                       |                   |                                         |         |
| Normal (0.3-4.4 mU/L)                | 559 (82.8%)           | 565 (83.7%)       | Risk difference: 0.009 (-0.031, 0.049)  | 0.66    |
| Abnormal (<0.3 or >4.4 mU/L)         | 116 (17.2%)           | 110 (16.3%)       | Risk difference: -0.009 (0.049, 0.031)  | 0.66    |
| Markedly abnormal (<0.1 or >10 mU/L) | 28 (4.2%)             | 22 (3.3%)         | Risk difference: -0.009 (-0.029, 0.011) | 0.39    |
| Mean TSH level (SD), mU/L            | 2.61 (2.73)           | 2.87 (4.89)       | Mean difference: 0.260 (-0.162, 0.683)  | 0.23    |
| Mean TSH change from baseline (SD)   | 0.44 (2.63)           | 0.67 (4.85)       | Mean difference: 0.234 (-0.183, 0.651)  | 0.27    |



**eTable 7.** Subgroup Analyses: Patients on Varying Doses of Levothyroxine (Using Robust Estimator of the Variance)

| Levothyroxine dose >100 mcg          | Patients, n (%)        |                    | Risk or mean difference (95% CI)        | P-value |
|--------------------------------------|------------------------|--------------------|-----------------------------------------|---------|
|                                      | Non-switchers (N=364)  | Switchers (N=364)  |                                         |         |
| TSH level                            |                        |                    |                                         |         |
| Normal (0.3-4.4 mU/L)                | 258 (70.9%)            | 279 (76.7%)        | Risk difference: 0.058 (-0.006, 0.122)  | 0.08    |
| Abnormal (<0.3 or >4.4 mU/L)         | 106 (29.1%)            | 85 (23.3%)         | Risk difference: -0.058 (-0.122, 0.006) | 0.08    |
| Markedly abnormal (<0.1 or >10 mU/L) | 32 (8.8%)              | 27 (7.4%)          | Risk difference: -0.014 (-0.053, 0.026) | 0.50    |
| Mean TSH level (SD), mU/L            | 2.53 (3.09)            | 2.53 (6.40)        | Mean difference: 0.000 (-0.731, 0.731)  | 1.00    |
| Mean TSH change from baseline (SD)   | 0.84 (3.10)            | 0.93 (6.30)        | Mean difference: 0.093 (-0.630, 0.815)  | 0.80    |
| Levothyroxine dose <=100 mcg         | Non-switchers (N=2409) | Switchers (N=2409) | Risk or mean difference (95% CI)        | P-value |
| TSH level                            |                        |                    |                                         |         |
| Normal (0.3-4.4 mU/L)                | 2034 (84.4%)           | 2062 (85.6%)       | Risk difference: 0.012 (-0.009, 0.032)  | 0.26    |
| Abnormal (<0.3 or >4.4 mU/L)         | 375 (15.6%)            | 347 (14.4%)        | Risk difference: -0.012 (-0.032, 0.009) | 0.26    |
| Markedly abnormal (<0.1 or >10 mU/L) | 50 (2.1%)              | 42 (1.7%)          | Risk difference: -0.003 (-0.011, 0.004) | 0.40    |
| Mean TSH level (SD), mU/L            | 2.83 (2.61)            | 2.76 (2.51)        | Mean difference: -0.066 (-0.211, 0.079) | 0.37    |
| Mean TSH change from baseline (SD)   | 0.55 (2.53)            | 0.47 (2.48)        | Mean difference: -0.081 (-0.223, 0.060) | 0.26    |
